# Supplementary material for: Dietary Essential Amino Acid Restriction Promotes Hyperdipsia via Hepatic FGF21
Source: Nutrients. 2021 Apr 26;13(5):1469. doi: 10.3390/nu13051469 (PMC8144947; doi:10.3390/nu13051469)
Supplement: Supplementary file 1 [file nutrients-13-01469-s001.zip › nutrients-1143342-supplementary.pdf]

**Supplementary Table 1. Diet formulations from Specialty Feeds.**

| Ingredient                                                                                                                                                                                                                                                                                                                                                                                                                                                 | Diet Number |        | SF17-175 | SF17-176 | SF17-177 | SF17-179 | SF18-066 | SF18-109 | SF18-110 | SF14-162 | SF17-144 | SF17-115 | SF19-086 |
|------------------------------------------------------------------------------------------------------------------------------------------------------------------------------------------------------------------------------------------------------------------------------------------------------------------------------------------------------------------------------------------------------------------------------------------------------------|-------------|--------|----------|----------|----------|----------|----------|----------|----------|----------|----------|----------|----------|
|                                                                                                                                                                                                                                                                                                                                                                                                                                                            | SF17-180    | g/kg   |          |          |          |          |          |          |          |          |          |          |          |
| Suucose<br>Casein<br>L Methionine<br>L Alanine<br>L Arginine<br>L Asparagine<br>L Aspartic Acid<br>L Cystine<br>L Glutamic Acid<br>L Glutamine<br>L Glycine<br>L Histidine<br>L Isoleucine<br>L Leudine<br>L Lysine<br>L Phenylalanine<br>L Proline<br>L Serine<br>L Threonine<br>L Tryptophan<br>L Tyrosine<br>L Valine<br>L Homoserine                                                                                                                   | 333.14      | 237.92 | 337.78   | 340.17   | 339.93   | 340.11   | 340.17   | 340.17   | 340.17   | 100      | 100      | 100      | 340.12   |
|                                                                                                                                                                                                                                                                                                                                                                                                                                                            | 190.37      | 47.58  | 48.25    |          |          |          |          |          |          | 200      | 34.88    | 159.5    |          |
|                                                                                                                                                                                                                                                                                                                                                                                                                                                            | 2.86        | 0.71   | 3.65     | 4.9      | 5.05     | 4.9      | 1.22     | 1.03     |          | 3        | 0.78     | 12.48    | 1.22     |
|                                                                                                                                                                                                                                                                                                                                                                                                                                                            |             |        | 3.65     | 4.9      | 5.05     | 4.9      | 1.22     | 1.03     |          |          | 3.47     | 7.52     | 7.52     |
|                                                                                                                                                                                                                                                                                                                                                                                                                                                            |             |        | 4.28     | 5.74     | 5.92     | 5.74     | 1.44     | 1.22     |          |          | 4.51     | 8.82     | 8.82     |
|                                                                                                                                                                                                                                                                                                                                                                                                                                                            |             |        | 5.03     | 6.75     | 6.96     | 6.75     | 1.69     | 1.43     |          |          | 3.74     | 10.38    | 10.38    |
|                                                                                                                                                                                                                                                                                                                                                                                                                                                            |             |        | 3.65     | 4.9      | 5.05     | 4.9      | 1.22     | 1.03     |          |          | 4        | 7.52     | 7.52     |
|                                                                                                                                                                                                                                                                                                                                                                                                                                                            |             |        | 1.81     | 1.19     | 1.22     | 1.19     | 0.3      | 0.25     |          |          | 0.24     | 1.82     | 1.82     |
|                                                                                                                                                                                                                                                                                                                                                                                                                                                            |             |        | 14.97    | 20.1     | 20.73    | 20.1     | 5.02     | 4.26     |          |          | 13.4     | 30.86    | 30.86    |
|                                                                                                                                                                                                                                                                                                                                                                                                                                                            |             |        | 12.32    | 16.55    | 17.07    | 16.55    | 4.14     | 3.51     |          |          | 11.27    | 25.42    | 25.42    |
|                                                                                                                                                                                                                                                                                                                                                                                                                                                            |             |        | 2.13     | 2.87     | 2.95     | 2.87     | 0.72     | 0.61     |          |          | 2.22     | 4.41     | 4.41     |
|                                                                                                                                                                                                                                                                                                                                                                                                                                                            |             |        | 3.27     | 4.39     | 4.63     | 4.39     | 1.1      | 0.93     |          |          | 3.22     | 1.1      | 1.1      |
|                                                                                                                                                                                                                                                                                                                                                                                                                                                            |             |        | 5.4      | 7.26     | 7.49     | 7.26     | 1.82     | 1.54     |          |          | 7.83     | 1.89     | 1.82     |
|                                                                                                                                                                                                                                                                                                                                                                                                                                                            |             |        | 11.32    | 15.2     | 15.68    | 15.2     | 3.8      | 3.22     |          |          | 14.26    | 3.8      | 3.8      |
|                                                                                                                                                                                                                                                                                                                                                                                                                                                            |             |        | 9.44     | 12.67    | 13.07    | 12.67    | 3.17     | 2.69     |          |          | 8.96     | 3.17     | 3.17     |
|                                                                                                                                                                                                                                                                                                                                                                                                                                                            |             |        | 6.04     | 8.11     | 8.36     | 8.1      | 2.03     | 1.72     |          |          | 5.83     | 2.03     | 2.03     |
|                                                                                                                                                                                                                                                                                                                                                                                                                                                            |             |        | 12.7     | 17.06    | 17.59    | 17.05    | 4.27     | 3.62     |          |          | 12.31    | 26.2     | 26.2     |
|                                                                                                                                                                                                                                                                                                                                                                                                                                                            |             |        | 7.17     | 9.63     | 9.94     | 9.63     | 2.41     | 2.04     |          |          | 6.62     | 14.79    | 14.79    |
|                                                                                                                                                                                                                                                                                                                                                                                                                                                            |             |        | 5.15     | 6.92     | 7.13     | 6.92     | 1.73     | 1.49     |          |          | 1.73     | 6.29     | 6.29     |
|                                                                                                                                                                                                                                                                                                                                                                                                                                                            |             |        | 1.51     | 2.02     | 2.09     | 2.02     | 0.51     | 0.43     |          |          | 0.23     | 0.51     | 0.51     |
|                                                                                                                                                                                                                                                                                                                                                                                                                                                            |             | 6.54   | 8.79     | 9.06     | 8.78     | 2.2      | 1.87     |          |          | 6.24     | 13.49    | 13.49    |          |
|                                                                                                                                                                                                                                                                                                                                                                                                                                                            |             | 6.66   | 8.94     | 9.94     | 8.94     | 2.24     | 1.9      |          |          | 10.44    | 2.54     | 2.24     |          |
| Soybean Oil<br>Lard<br>Cellulose<br>Wheat Starch<br>Dextrinised Starch<br>AIN93 Trace Minerals<br>Calcium Carbonate<br>Salt<br>Potassium Dihydrogen Phosphate<br>Sodium Bicarbonate<br>Potassium Sulphate<br>Potassium Citrate<br>Dicalcium Phosphate<br>AIN 93 Vitamins<br>Choline Chloride 75%<br>Red Food Colour (124)<br>Blue Food Colour 10% (133)<br>Egg Yellow Food Colour (102)<br>Green Food Colour (133, 102)<br>Sunset Yellow Food Colour (110) | 23.8        | 23.79  | 24.13    | 24.3     | 24.28    | 24.29    | 24.29    | 24.29    | 24.29    | 70       | 70       | 70       | 24.29    |
|                                                                                                                                                                                                                                                                                                                                                                                                                                                            | 19.04       | 19.03  | 19.3     | 19.44    | 19.42    | 19.43    | 19.44    | 19.44    | 19.44    |          | 19.44    |          | 19.44    |
|                                                                                                                                                                                                                                                                                                                                                                                                                                                            | 47.59       | 47.58  | 48.25    | 48.59    | 48.56    | 48.59    | 48.59    | 48.59    | 48.59    | 50       | 90.65    | 63.24    | 48.59    |
|                                                                                                                                                                                                                                                                                                                                                                                                                                                            | 299.83      | 501.78 | 304      | 306.15   | 305.95   | 306.11   | 423.07   | 423.15   | 423.15   | 404.41   | 403.19   | 403.91   | 306.11   |
|                                                                                                                                                                                                                                                                                                                                                                                                                                                            | 33.31       | 71.38  | 33.78    | 34.02    | 33.99    | 34.01    | 43.74    | 43.73    | 43.73    | 132      | 132      | 132      | 34.01    |
|                                                                                                                                                                                                                                                                                                                                                                                                                                                            | 1.33        | 1.33   | 1.35     | 1.36     | 1.36     | 1.36     | 1.36     | 1.36     | 1.36     | 1.4      | 1.4      | 1.4      | 1.36     |
|                                                                                                                                                                                                                                                                                                                                                                                                                                                            | 5.24        | 5.23   | 5.31     | 5.35     | 5.34     | 5.34     | 5.34     | 5.35     | 5.34     | 13.13    | 13.1     | 5.34     | 5.34     |
|                                                                                                                                                                                                                                                                                                                                                                                                                                                            | 2.47        | 2.47   | 2.51     | 2.53     | 2.53     | 2.53     | 2.53     | 2.53     | 2.53     | 2.59     | 2.59     | 2.53     | 2.53     |
|                                                                                                                                                                                                                                                                                                                                                                                                                                                            |             |        |          |          |          |          |          |          |          | 6.86     | 10.11    | 6.04     |          |
|                                                                                                                                                                                                                                                                                                                                                                                                                                                            |             |        | 7.24     | 7.29     | 7.28     | 7.29     | 7.29     | 7.29     | 7.29     | 7.29     |          |          | 7.29     |
|                                                                                                                                                                                                                                                                                                                                                                                                                                                            |             | 1.52   | 1.54     | 1.56     | 1.56     | 1.55     | 1.55     | 1.56     | 1.56     | 1.63     | 7.53     | 1.18     | 1.55     |
|                                                                                                                                                                                                                                                                                                                                                                                                                                                            |             | 15.71  | 15.71    | 15.92    | 16.04    | 16.03    | 16.03    | 16.03    | 16.04    | 16.03    | 2.48     | 2.48     | 16.03    |
|                                                                                                                                                                                                                                                                                                                                                                                                                                                            | 12.37       | 12.37  | 12.55    | 12.63    | 12.63    | 12.63    | 12.63    | 12.63    | 12.63    |          |          | 12.63    |          |
|                                                                                                                                                                                                                                                                                                                                                                                                                                                            | 9.52        | 9.52   | 9.65     | 9.72     | 9.71     | 9.72     | 9.72     | 9.72     | 9.72     | 10       | 10       | 9.72     |          |
|                                                                                                                                                                                                                                                                                                                                                                                                                                                            | 1.91        | 1.91   | 1.93     | 1.94     | 1.94     | 1.94     | 1.94     | 1.94     | 1.94     | 2.5      | 2.5      | 1.94     |          |
|                                                                                                                                                                                                                                                                                                                                                                                                                                                            |             |        |          |          |          |          |          |          |          |          |          |          |          |
|                                                                                                                                                                                                                                                                                                                                                                                                                                                            |             | 0.02   |          |          |          |          |          |          |          |          |          |          | 0.19     |
|                                                                                                                                                                                                                                                                                                                                                                                                                                                            |             | 0.15   |          |          | 0.02     | 0.02     | 0.05     | 0.03     | 0.02     |          |          |          |          |
|                                                                                                                                                                                                                                                                                                                                                                                                                                                            |             |        |          | 0.02     |          |          |          |          |          |          |          |          |          |
|                                                                                                                                                                                                                                                                                                                                                                                                                                                            |             |        |          |          |          |          |          |          |          |          |          |          |          |
|                                                                                                                                                                                                                                                                                                                                                                                                                                                            |             |        |          |          |          |          |          |          |          |          |          |          |          |
|                                                                                                                                                                                                                                                                                                                                                                                                                                                            |             |        |          |          |          |          |          |          |          |          |          |          |          |
|                                                                                                                                                                                                                                                                                                                                                                                                                                                            |             |        |          |          |          |          |          |          |          |          |          |          |          |
|                                                                                                                                                                                                                                                                                                                                                                                                                                                            |             |        |          |          |          |          |          |          |          |          |          |          |          |
|                                                                                                                                                                                                                                                                                                                                                                                                                                                            |             |        |          |          |          |          |          |          |          |          |          |          |          |
|                                                                                                                                                                                                                                                                                                                                                                                                                                                            |             |        |          |          |          |          |          |          |          |          |          |          |          |
|                                                                                                                                                                                                                                                                                                                                                                                                                                                            |             |        |          |          |          |          |          |          |          |          |          |          |          |
|                                                                                                                                                                                                                                                                                                                                                                                                                                                            |             |        |          |          |          |          |          |          |          |          |          |          |          |
|                                                                                                                                                                                                                                                                                                                                                                                                                                                            |             |        |          |          |          |          |          |          |          |          |          |          |          |
|                                                                                                                                                                                                                                                                                                                                                                                                                                                            |             |        |          |          |          |          |          |          |          |          |          |          |          |
|                                                                                                                                                                                                                                                                                                                                                                                                                                                            |             |        |          |          |          |          |          |          |          |          |          |          |          |
|                                                                                                                                                                                                                                                                                                                                                                                                                                                            |             |        |          |          |          |          |          |          |          |          |          |          |          |
|                                                                                                                                                                                                                                                                                                                                                                                                                                                            |             |        |          |          |          |          |          |          |          |          |          |          |          |
|                                                                                                                                                                                                                                                                                                                                                                                                                                                            |             |        |          |          |          |          |          |          |          |          |          |          |          |
|                                                                                                                                                                                                                                                                                                                                                                                                                                                            |             |        |          |          |          |          |          |          |          |          |          |          |          |
|                                                                                                                                                                                                                                                                                                                                                                                                                                                            |             |        |          |          |          |          |          |          |          |          |          |          |          |
|                                                                                                                                                                                                                                                                                                                                                                                                                                                            |             |        |          |          |          |          |          |          |          |          |          |          |          |
|                                                                                                                                                                                                                                                                                                                                                                                                                                                            |             |        |          |          |          |          |          |          |          |          |          |          |          |
|                                                                                                                                                                                                                                                                                                                                                                                                                                                            |             |        |          |          |          |          |          |          |          |          |          |          |          |
|                                                                                                                                                                                                                                                                                                                                                                                                                                                            |             |        |          |          |          |          |          |          |          |          |          |          |          |
|                                                                                                                                                                                                                                                                                                                                                                                                                                                            |             |        |          |          |          |          |          |          |          |          |          |          |          |
|                                                                                                                                                                                                                                                                                                                                                                                                                                                            |             |        |          |          |          |          |          |          |          |          |          |          |          |
|                                                                                                                                                                                                                                                                                                                                                                                                                                                            |             |        |          |          |          |          |          |          |          |          |          |          |          |
|                                                                                                                                                                                                                                                                                                                                                                                                                                                            |             |        |          |          |          |          |          |          |          |          |          |          |          |
|                                                                                                                                                                                                                                                                                                                                                                                                                                                            |             |        |          |          |          |          |          |          |          |          |          |          |          |
|                                                                                                                                                                                                                                                                                                                                                                                                                                                            |             |        |          |          |          |          |          |          |          |          |          |          |          |
|                                                                                                                                                                                                                                                                                                                                                                                                                                                            |             |        |          |          |          |          |          |          |          |          |          |          |          |
|                                                                                                                                                                                                                                                                                                                                                                                                                                                            |             |        |          |          |          |          |          |          |          |          |          |          |          |
|                                                                                                                                                                                                                                                                                                                                                                                                                                                            |             |        |          |          |          |          |          |          |          |          |          |          |          |
|                                                                                                                                                                                                                                                                                                                                                                                                                                                            |             |        |          |          |          |          |          |          |          |          |          |          |          |
|                                                                                                                                                                                                                                                                                                                                                                                                                                                            |             |        |          |          |          |          |          |          |          |          |          |          |          |
|                                                                                                                                                                                                                                                                                                                                                                                                                                                            |             |        |          |          |          |          |          |          |          |          |          |          |          |
|                                                                                                                                                                                                                                                                                                                                                                                                                                                            |             |        |          |          |          |          |          |          |          |          |          |          |          |
|                                                                                                                                                                                                                                                                                                                                                                                                                                                            |             |        |          |          |          |          |          |          |          |          |          |          |          |
|                                                                                                                                                                                                                                                                                                                                                                                                                                                            |             |        |          |          |          |          |          |          |          |          |          |          |          |
|                                                                                                                                                                                                                                                                                                                                                                                                                                                            |             |        |          |          |          |          |          |          |          |          |          |          |          |
|                                                                                                                                                                                                                                                                                                                                                                                                                                                            |             |        |          |          |          |          |          |          |          |          |          |          |          |
|                                                                                                                                                                                                                                                                                                                                                                                                                                                            |             |        |          |          |          |          |          |          |          |          |          |          |          |
|                                                                                                                                                                                                                                                                                                                                                                                                                                                            |             |        |          |          |          |          |          |          |          |          |          |          |          |
|                                                                                                                                                                                                                                                                                                                                                                                                                                                            |             |        |          |          |          |          |          |          |          |          |          |          |          |
|                                                                                                                                                                                                                                                                                                                                                                                                                                                            |             |        |          |          |          |          |          |          |          |          |          |          |          |
|                                                                                                                                                                                                                                                                                                                                                                                                                                                            |             |        |          |          |          |          |          |          |          |          |          |          |          |
|                                                                                                                                                                                                                                                                                                                                                                                                                                                            |             |        |          |          |          |          |          |          |          |          |          |          |          |
|                                                                                                                                                                                                                                                                                                                                                                                                                                                            |             |        |          |          |          |          |          |          |          |          |          |          |          |
|                                                                                                                                                                                                                                                                                                                                                                                                                                                            |             |        |          |          |          |          |          |          |          |          |          |          |          |
|                                                                                                                                                                                                                                                                                                                                                                                                                                                            |             |        |          | </       |          |          |          |          |          |          |          |          |          |

Supplementary Table 2. Diet formulations from Research Diets.

| Product #                             | A14011801           | A14011802           | A14011803          | A14011804        | A14011805        | A14011806        | A18125601           | A18125602           | A18125603           | A17020801           | A17020802           | A17020803           | A17041301           | A17041302           | A17041303           |
|---------------------------------------|---------------------|---------------------|--------------------|------------------|------------------|------------------|---------------------|---------------------|---------------------|---------------------|---------------------|---------------------|---------------------|---------------------|---------------------|
|                                       | 41.7% EAA, 63.3% NE | 41.7% EAA, 63.3% NE | 15.2% EAA, 100% NE | 100% EAA, 25% NE | 100% EAA, 25% NE | 100% EAA, 25% NE | 10.5% EAA, 80.7% NE | 17.0% EAA, 10.0% NE | 23.0% EAA, 75.0% NE | 15.5% EAA, 34.5% NE | 15.2% EAA, 84.8% NE | 11.2% EAA, 88.8% NE | 38.0% EAA, 62.0% NE | 38.0% EAA, 62.0% NE | 41.2% EAA, 58.8% NE |
| Protein                               | 16.8                | 17.6                | 4.2                | 4.4              | 11.6             | 15.8             | 15.8                | 17.6                | 16.8                | 16.9                | 17.7                | 16.8                | 16.8                | 17.6                | 16.8                |
| Carbohydrate                          | 68.7                | 72.1                | 81.3               | 65.3             | 74.0             | 77.6             | 68.7                | 72.1                | 68.7                | 68.7                | 72.0                | 68.7                | 72.1                | 68.7                | 72.1                |
| Fat                                   | 4.4                 | 10.3                | 4.4                | 10.3             | 4.4              | 10.3             | 4.4                 | 10.3                | 4.4                 | 4.4                 | 10.3                | 4.4                 | 10.3                | 4.4                 | 10.3                |
| Total                                 | 100.0               | 100.0               | 100.0              | 100.0            | 100.0            | 100.0            | 100.0               | 100.0               | 100.0               | 100.0               | 100.0               | 100.0               | 100.0               | 100.0               | 100.0               |
| Ingredient (g)                        | 3.8                 | 3.8                 | 3.8                | 3.8              | 3.8              | 3.8              | 3.8                 | 3.8                 | 3.8                 | 3.8                 | 3.8                 | 3.8                 | 3.8                 | 3.8                 | 3.8                 |
| L-Histidine-HCl-H <sub>2</sub> O      | 4.52                | 18.08               | 1.13               | 4.5              | 4.52             | 18.08            | 1.13                | 4.5                 | 4.52                | 18.08               | 1.13                | 4.5                 | 4.52                | 18.08               | 1.13                |
| L-Isoisoleucine                       | 7.47                | 29.88               | 1.97               | 7.5              | 7.47             | 29.88            | 1.97                | 7.5                 | 7.47                | 29.88               | 1.97                | 7.5                 | 7.47                | 29.88               | 1.97                |
| L-Leucine                             | 15.64               | 53.56               | 3.91               | 15.6             | 15.64            | 53.56            | 3.91                | 15.6                | 15.64               | 53.56               | 3.91                | 15.6                | 15.64               | 53.56               | 3.91                |
| L-Lysine-HCl                          | 13.04               | 52.16               | 3.88               | 13.0             | 13.04            | 52.16            | 3.88                | 13.0                | 13.04               | 52.16               | 3.88                | 13.0                | 13.04               | 52.16               | 3.88                |
| L-Methionine                          | 5.04                | 20.16               | 1.35               | 5.0              | 5.04             | 20.16            | 1.35                | 5.0                 | 5.04                | 20.16               | 1.35                | 5.0                 | 5.04                | 20.16               | 1.35                |
| L-Phenylalanine                       | 8.34                | 33.36               | 2.05               | 8.4              | 8.34             | 33.36            | 2.05                | 8.4                 | 8.34                | 33.36               | 2.05                | 8.4                 | 8.34                | 33.36               | 2.05                |
| L-Threonine                           | 7.12                | 28.48               | 1.78               | 7.1              | 7.12             | 28.48            | 1.78                | 7.1                 | 7.12                | 28.48               | 1.78                | 7.1                 | 7.12                | 28.48               | 1.78                |
| L-Tryptophan                          | 2.08                | 8.32                | 0.62               | 2.1              | 2.08             | 8.32             | 0.62                | 2.1                 | 2.08                | 8.32                | 0.62                | 2.1                 | 2.08                | 8.32                | 0.62                |
| L-Valine                              | 9.20                | 36.8                | 2.9                | 9.2              | 9.20             | 36.8             | 2.9                 | 9.2                 | 9.20                | 36.8                | 2.9                 | 9.2                 | 9.20                | 36.8                | 2.9                 |
| L-Mannine                             | 5.04                | 20.16               | 1.35               | 5.0              | 5.04             | 20.16            | 1.35                | 5.0                 | 5.04                | 20.16               | 1.35                | 5.0                 | 5.04                | 20.16               | 1.35                |
| L-Asparagine-H <sub>2</sub> O         | 5.91                | 23.64               | 1.48               | 5.9              | 5.91             | 23.64            | 1.48                | 5.9                 | 5.91                | 23.64               | 1.48                | 5.9                 | 5.91                | 23.64               | 1.48                |
| L-Aspartic acid                       | 6.95                | 27.8                | 1.74               | 6.9              | 6.95             | 27.8             | 1.74                | 6.9                 | 6.95                | 27.8                | 1.74                | 6.9                 | 6.95                | 27.8                | 1.74                |
| L-Asparagine                          | 1.24                | 4.96                | 0.31               | 1.2              | 1.24             | 4.96             | 0.31                | 1.2                 | 1.24                | 4.96                | 0.31                | 1.2                 | 1.24                | 4.96                | 0.31                |
| L-Glutamine                           | 17.03               | 68.12               | 4.52               | 17.0             | 17.03            | 68.12            | 4.52                | 17.0                | 17.03               | 68.12               | 4.52                | 17.0                | 17.03               | 68.12               | 4.52                |
| L-Glutamic Acid                       | 20.69               | 82.72               | 5.17               | 20.7             | 20.69            | 82.72            | 5.17                | 20.7                | 20.69               | 82.72               | 5.17                | 20.7                | 20.69               | 82.72               | 5.17                |
| Glycine                               | 2.56                | 11.8                | 0.74               | 2.6              | 2.56             | 11.8             | 0.74                | 2.6                 | 2.56                | 11.8                | 0.74                | 2.6                 | 2.56                | 11.8                | 0.74                |
| L-Proline                             | 17.55               | 70.2                | 4.39               | 17.6             | 17.55            | 70.2             | 4.39                | 17.6                | 17.55               | 70.2                | 4.39                | 17.6                | 17.55               | 70.2                | 4.39                |
| L-Gerine                              | 9.31                | 39.64               | 2.48               | 9.3              | 9.31             | 39.64            | 2.48                | 9.3                 | 9.31                | 39.64               | 2.48                | 9.3                 | 9.31                | 39.64               | 2.48                |
| L-Tyrosine                            | 9.04                | 36.16               | 2.35               | 9.0              | 9.04             | 36.16            | 2.35                | 9.0                 | 9.04                | 36.16               | 2.35                | 9.0                 | 9.04                | 36.16               | 2.35                |
| Com Starch                            | 315                 | 1260                | 435.2              | 315              | 315              | 1260             | 435.2               | 315                 | 315                 | 1260                | 435.2               | 315                 | 315                 | 1260                | 435.2               |
| Maltodextrin 10                       | 35                  | 140                 | 45                 | 35               | 35               | 140              | 45                  | 35                  | 35                  | 140                 | 45                  | 35                  | 35                  | 140                 | 45                  |
| Sucrose                               | 350                 | 1400                | 350                | 350              | 350              | 1400             | 350                 | 350                 | 350                 | 1400                | 350                 | 350                 | 350                 | 1400                | 350                 |
| Cellulose                             | 50                  | 0                   | 50                 | 0                | 50               | 0                | 50                  | 0                   | 50                  | 0                   | 50                  | 0                   | 50                  | 0                   | 50                  |
| Soybean Oil                           | 25                  | 225                 | 25                 | 225              | 25               | 225              | 25                  | 225                 | 25                  | 225                 | 25                  | 225                 | 25                  | 225                 | 25                  |
| Lard                                  | 20                  | 180                 | 20                 | 180              | 20               | 180              | 20                  | 180                 | 20                  | 180                 | 20                  | 180                 | 20                  | 180                 | 20                  |
| Sodium Bicarbonate                    | 7.5                 | 0                   | 7.5                | 0                | 7.5              | 0                | 7.5                 | 0                   | 7.5                 | 0                   | 7.5                 | 0                   | 7.5                 | 0                   | 7.5                 |
| S-100S                                | 10                  | 0                   | 10                 | 0                | 10               | 0                | 10                  | 0                   | 10                  | 0                   | 10                  | 0                   | 10                  | 0                   | 10                  |
| Calcium Phosphate                     | 5.5                 | 0                   | 5.5                | 0                | 5.5              | 0                | 5.5                 | 0                   | 5.5                 | 0                   | 5.5                 | 0                   | 5.5                 | 0                   | 5.5                 |
| Calcium Carbonate                     | 5.5                 | 0                   | 5.5                | 0                | 5.5              | 0                | 5.5                 | 0                   | 5.5                 | 0                   | 5.5                 | 0                   | 5.5                 | 0                   | 5.5                 |
| Potassium Citrate, 1 H <sub>2</sub> O | 16.5                | 0                   | 16.5               | 0                | 16.5             | 0                | 16.5                | 0                   | 16.5                | 0                   | 16.5                | 0                   | 16.5                | 0                   | 16.5                |
| Vitamin Mix V10001                    | 10                  | 40                  | 10                 | 40               | 10               | 40               | 10                  | 40                  | 10                  | 40                  | 10                  | 40                  | 10                  | 40                  | 10                  |
| Choline Bitartrate                    | 2                   | 0                   | 2                  | 0                | 2                | 0                | 2                   | 0                   | 2                   | 0                   | 2                   | 0                   | 2                   | 0                   | 2                   |
| FD&C Yellow Dye #5                    | 0.05                | 0                   | 0.025              | 0                | 0.025            | 0                | 0.025               | 0                   | 0.025               | 0                   | 0.025               | 0                   | 0.025               | 0                   | 0.025               |
| FD&C Red Dye #40                      | 0                   | 0                   | 0.025              | 0                | 0.025            | 0                | 0.025               | 0                   | 0.025               | 0                   | 0.025               | 0                   | 0.025               | 0                   | 0.025               |
| FD&C Blue Dye #1                      | 0                   | 0                   | 0                  | 0                | 0.025            | 0                | 0.025               | 0                   | 0.025               | 0                   | 0.025               | 0                   | 0.025               | 0                   | 0.025               |
| Total                                 | 1003.32             | 3940                | 1003.32            | 3940             | 1003.32          | 3940             | 1003.32             | 3940                | 1003.32             | 3940                | 1003.32             | 3940                | 1003.32             | 3940                | 1003.32             |
| Percent EAA (w/w)                     | 41.7                | 41.7                | 15.2               | 100              | 100              | 100              | 10.5                | 17                  | 23                  | 15.5                | 15.2                | 11.2                | 38                  | 38                  | 41.2                |
| Percent NEAA (w/w)                    | 58.3                | 58.3                | 84.8               | 0                | 0                | 0                | 89.5                | 83                  | 75                  | 84.5                | 84.8                | 88.8                | 62                  | 62                  | 58.8                |
